# Supplementary material for: Synthesis of graphene via electrochemical exfoliation in different electrolytes for direct electrodeposition of a Cu/graphene composite coating
Source: Royal Society of Chemistry journal article supplement (doi:10.1039/c9ra06541e), 2019-01-01
Supplement: c9ra06541e1.pdf [file c9ra06541e1.pdf]

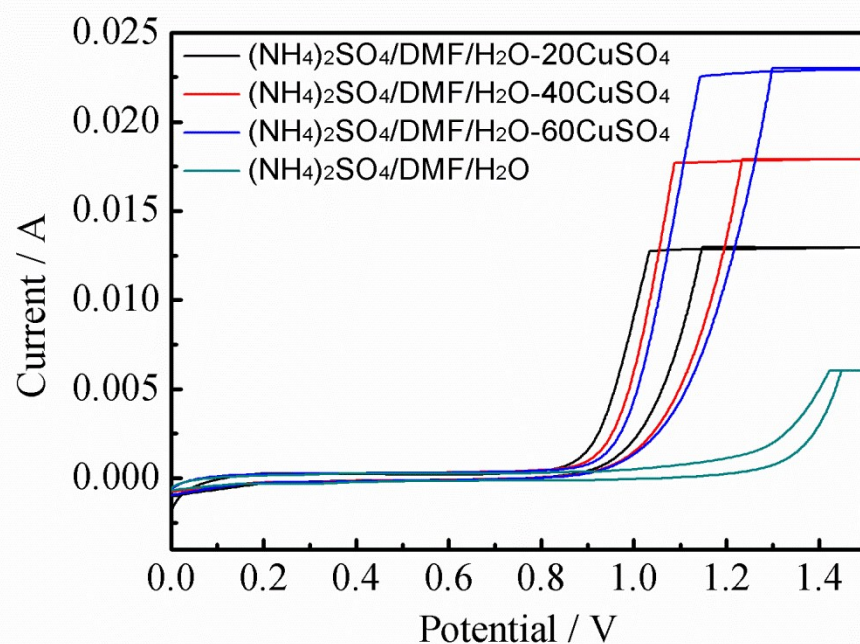

Figure S1 CV curves measured in the  $(\text{NH}_4)_2\text{SO}_4/\text{DMF}/\text{H}_2\text{O}$  solution and  $(\text{NH}_4)_2\text{SO}_4/\text{DMF}/\text{H}_2\text{O}$  solutions with different content of  $\text{CuSO}_4$

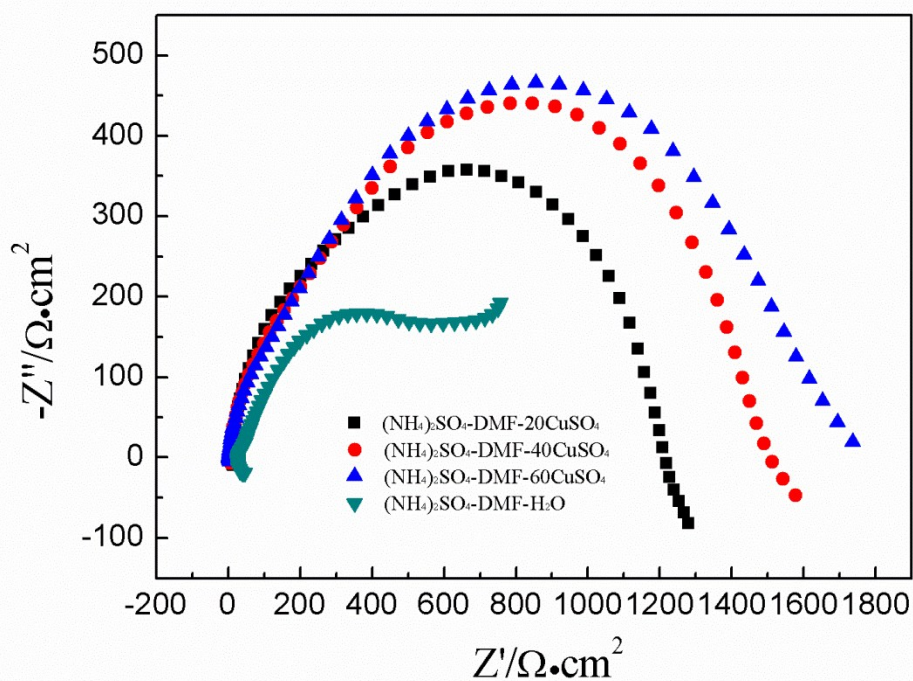

Figure S2 EIS curves of the  $(\text{NH}_4)_2\text{SO}_4/\text{DMF}/\text{H}_2\text{O}$  with and without  $\text{CuSO}_4$

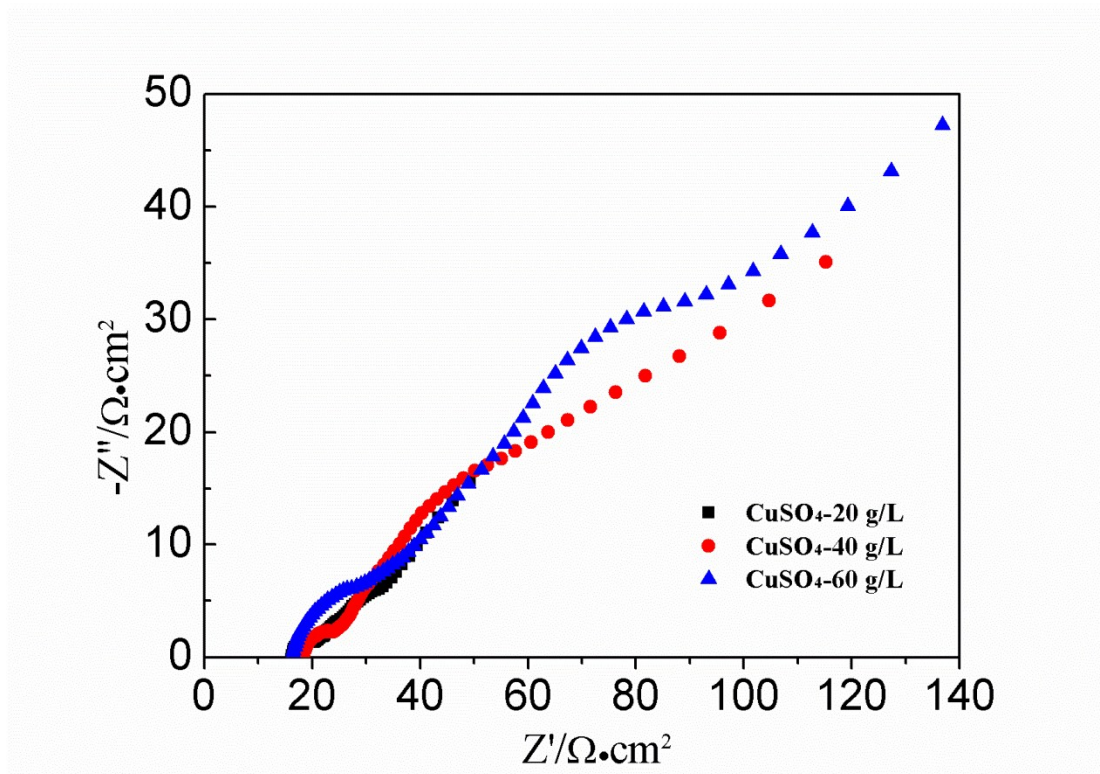

Figure S3 EIS curves of the  $\text{CuSO}_4/\text{DMF}/\text{H}_2\text{O}$  with  $\text{CuSO}_4$  content of 20 g/L, 40 g/L and 60 g/L
